# Supplementary material for: p53 triggers mitochondrial apoptosis following DNA damage-dependent replication stress by the hepatotoxin methyleugenol
Source: PubMed Central journal article supplement (PMC9708695; doi:10.1038/s41419-022-05446-9), 2022-11-29

**Fig. 2A**

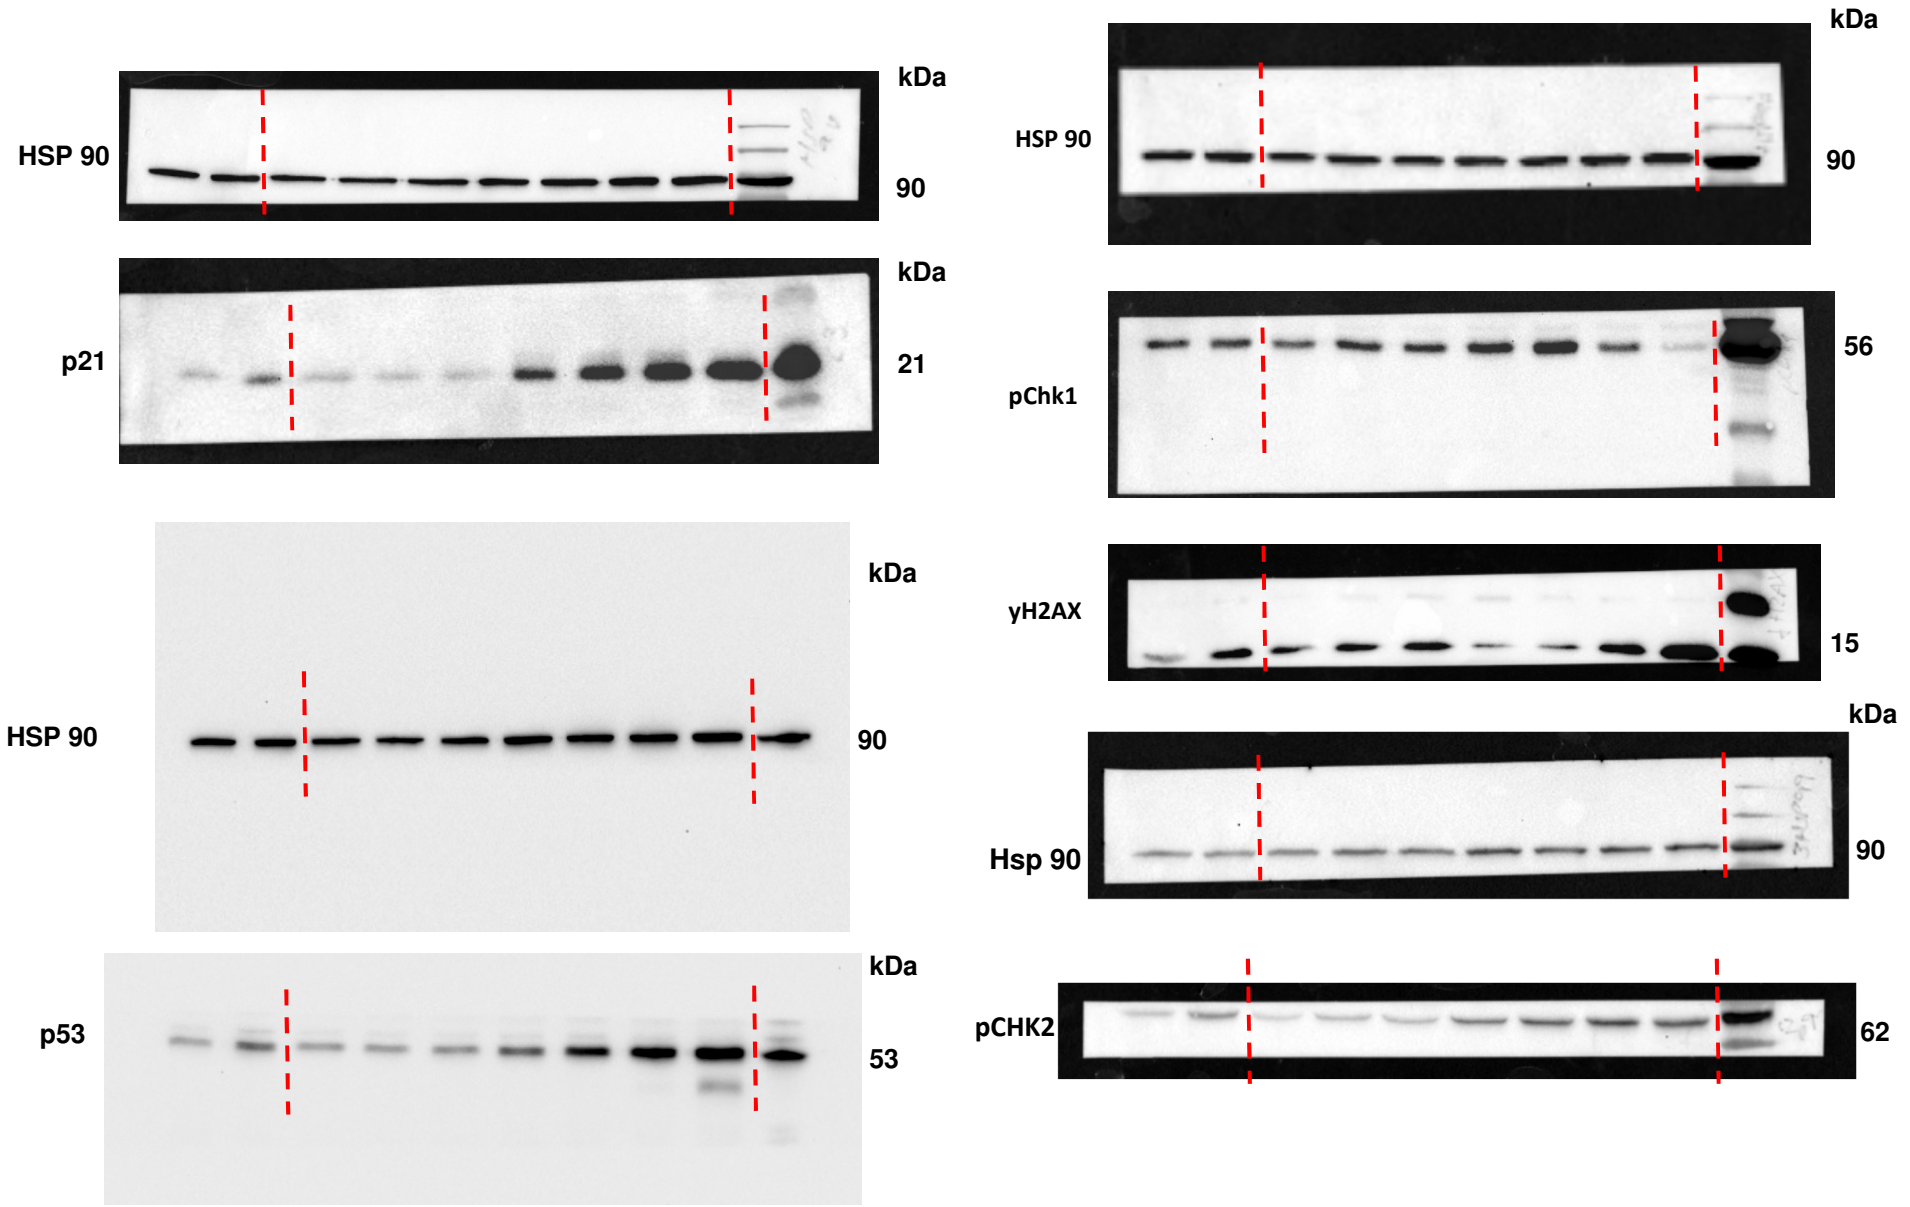

**Fig. 2B**

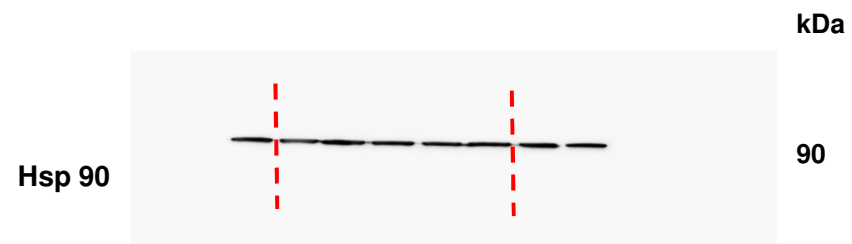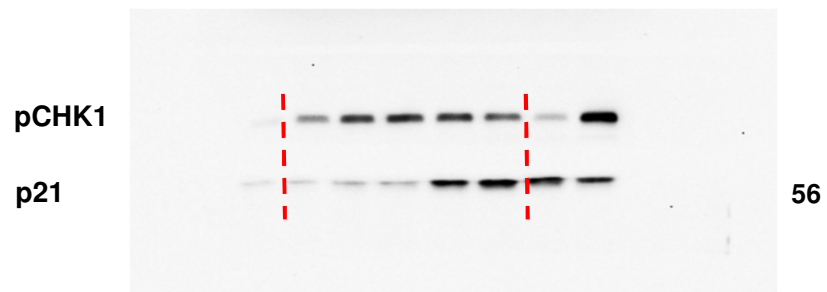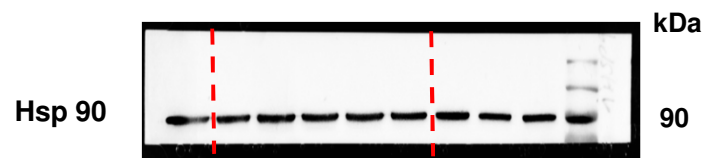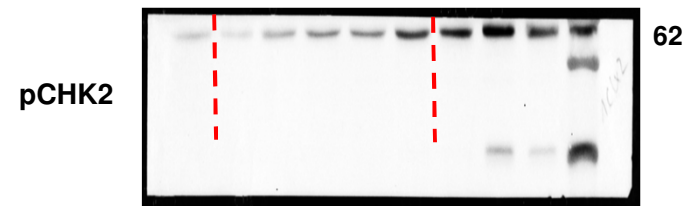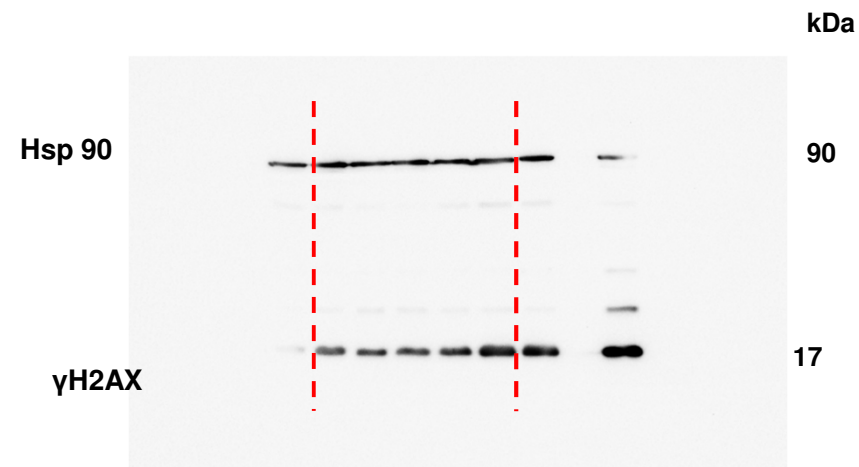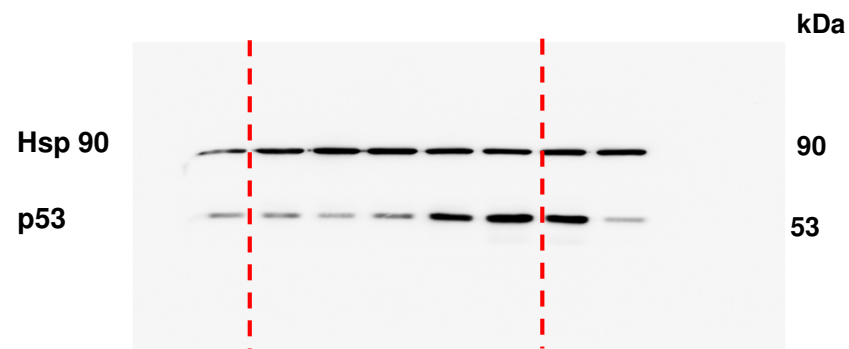

**Fig. 3G**

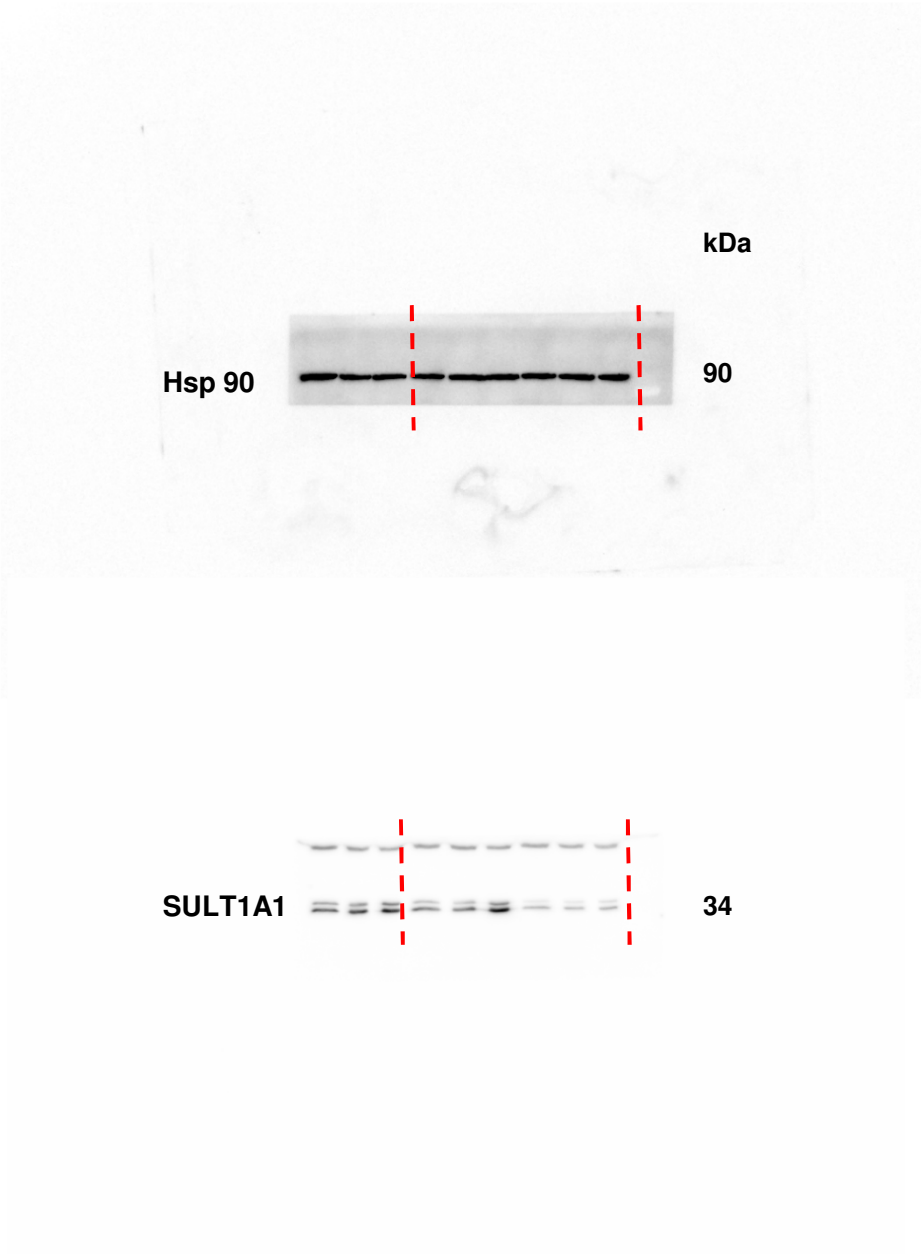

**Fig. 4D**

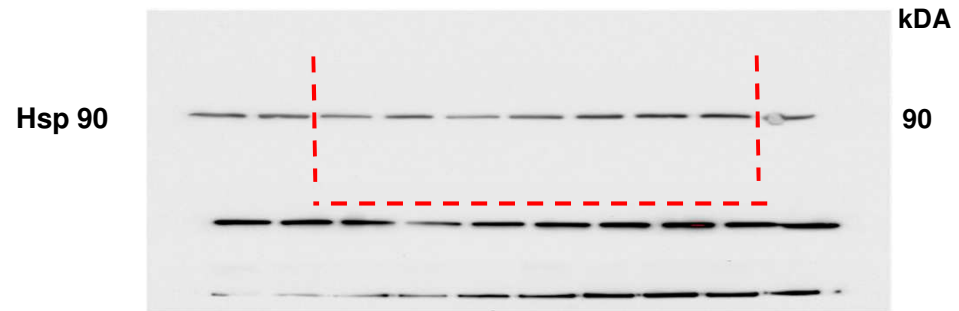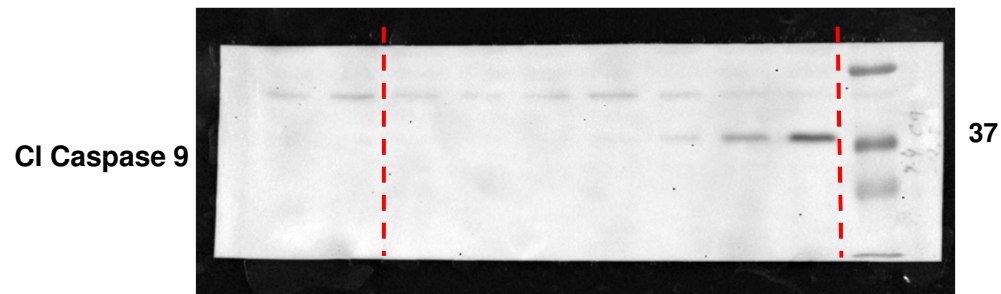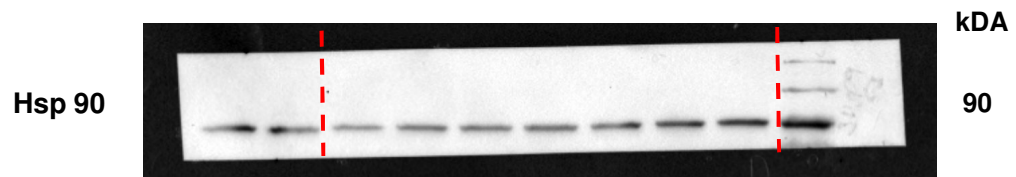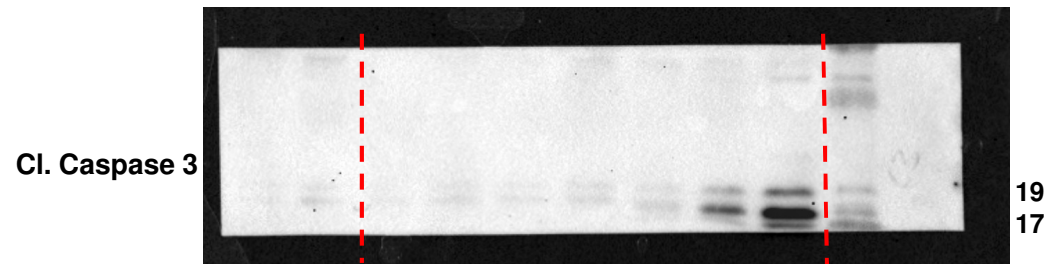

**Fig. 5A**

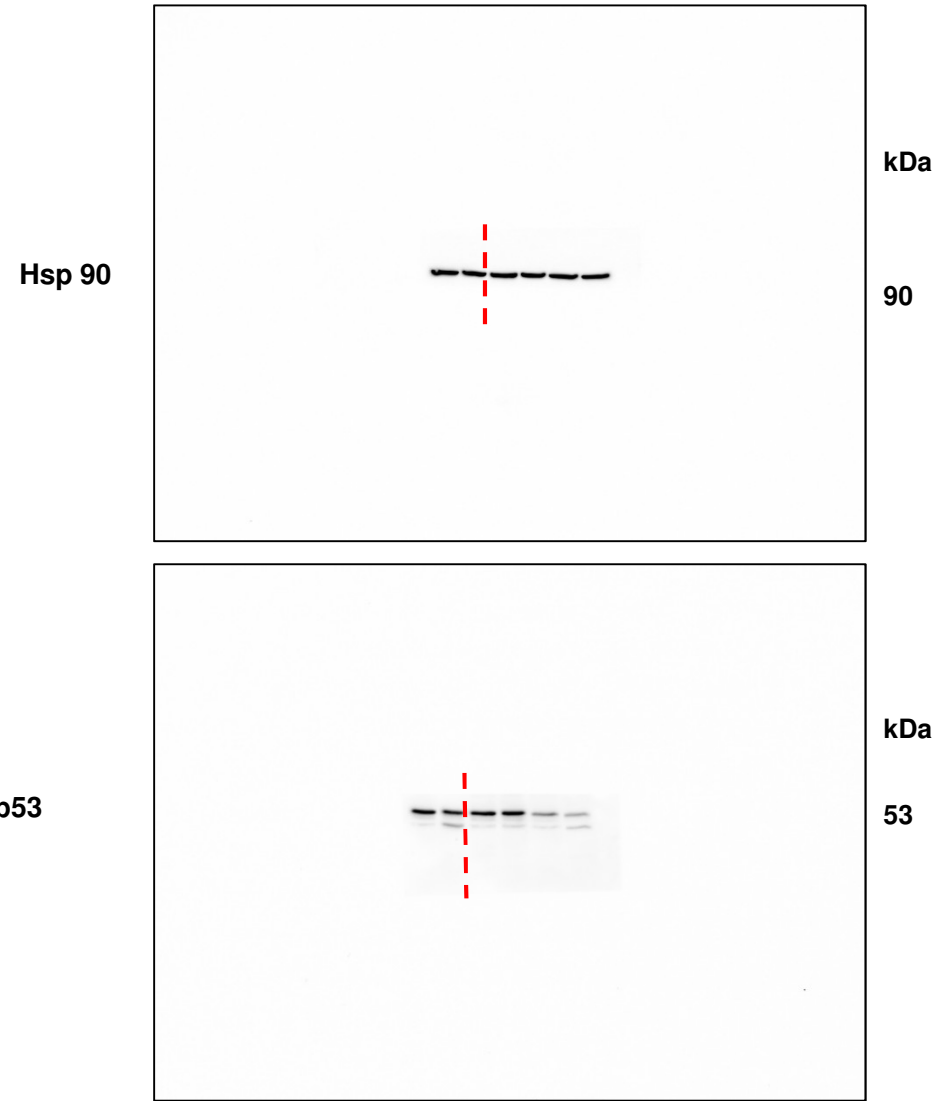

**Fig. 5F**

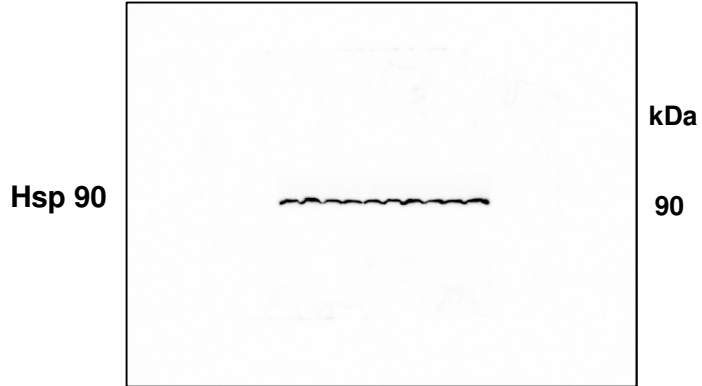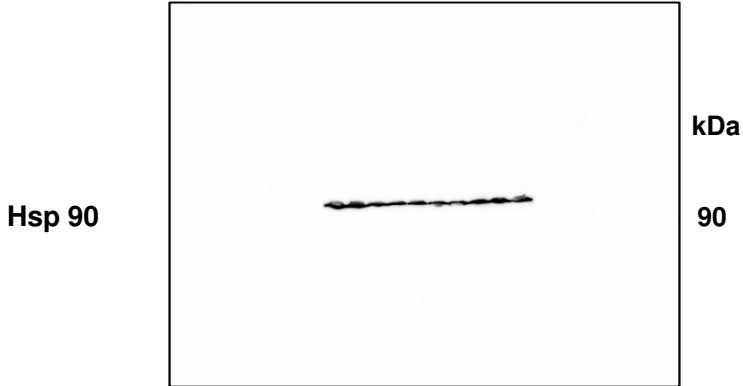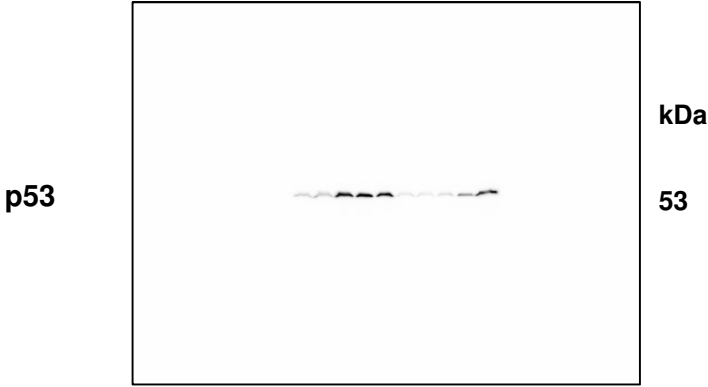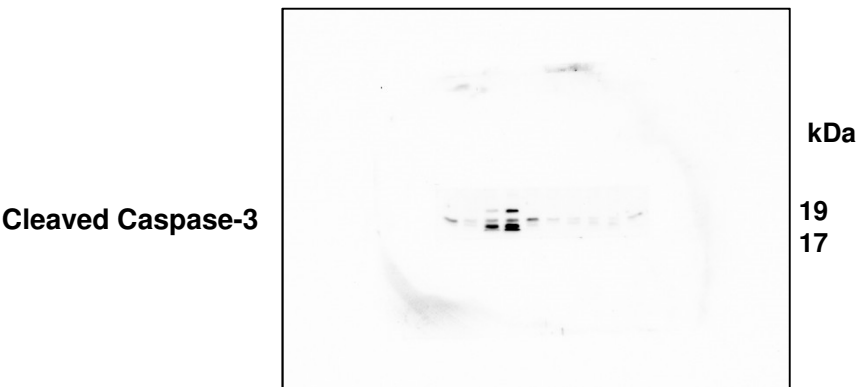

**Fig. S2B**

**Hsp90**

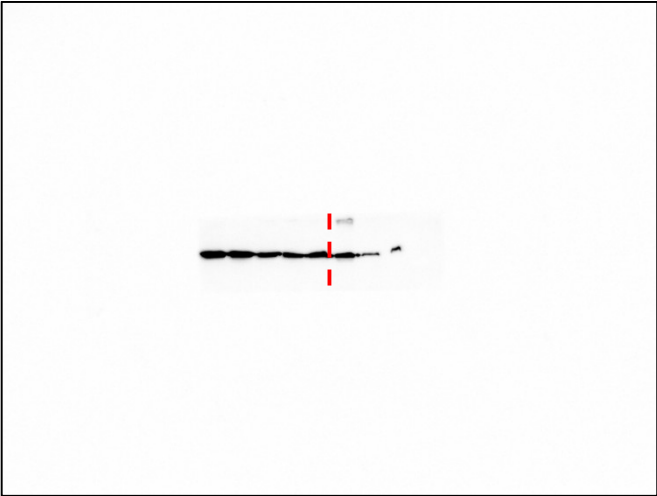

**kDa**

**90**

**SULT1A1**

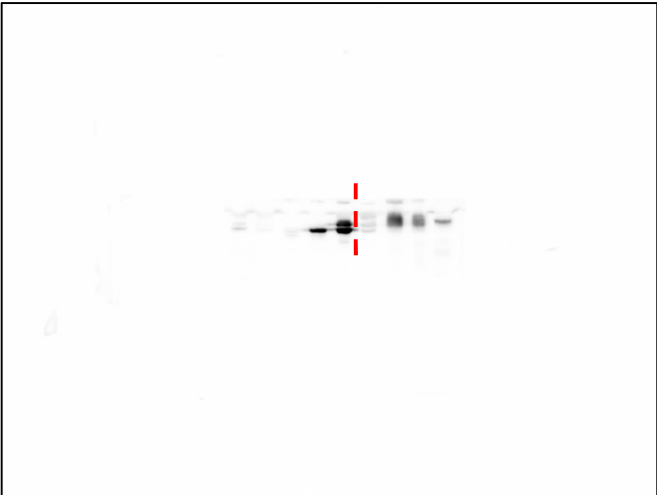

**kDa**

**34**

**Fig. S4D**

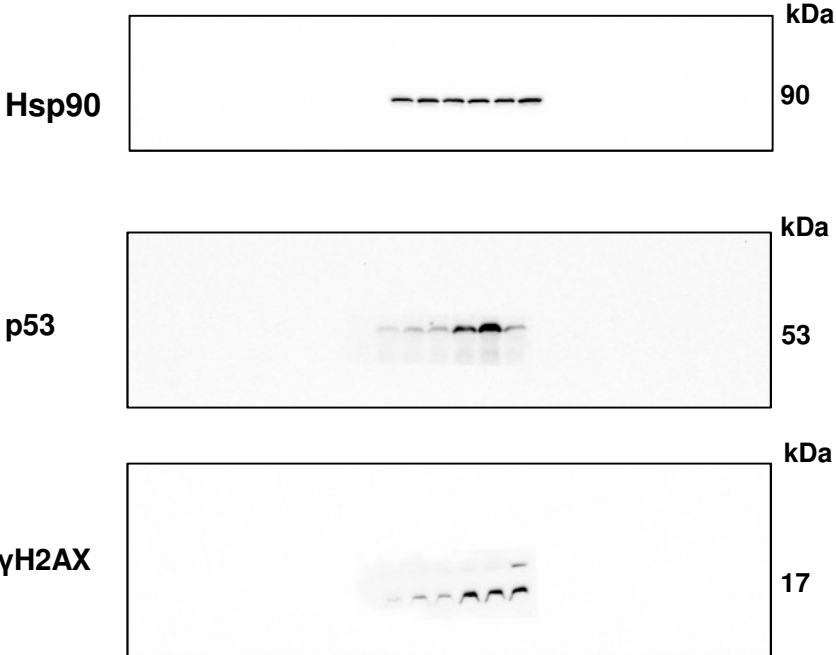



**Fig. S4E**

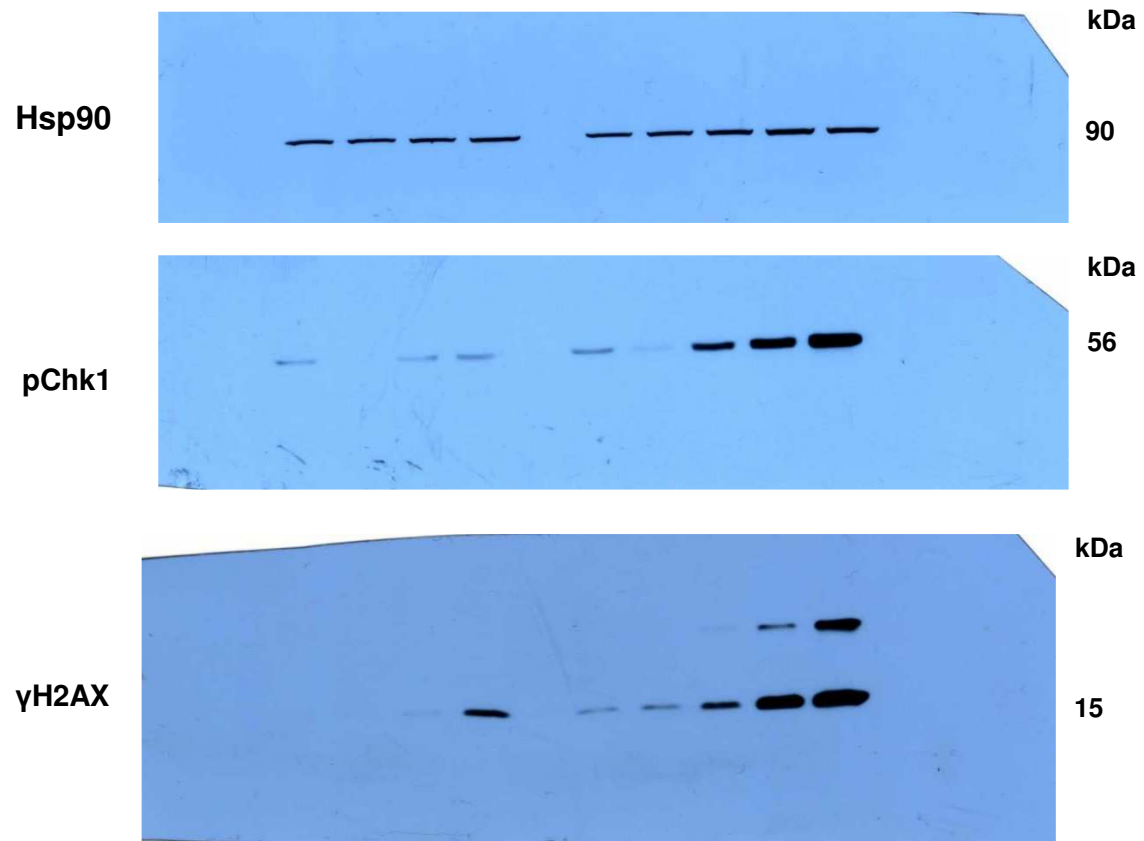

**Fig. S4F**

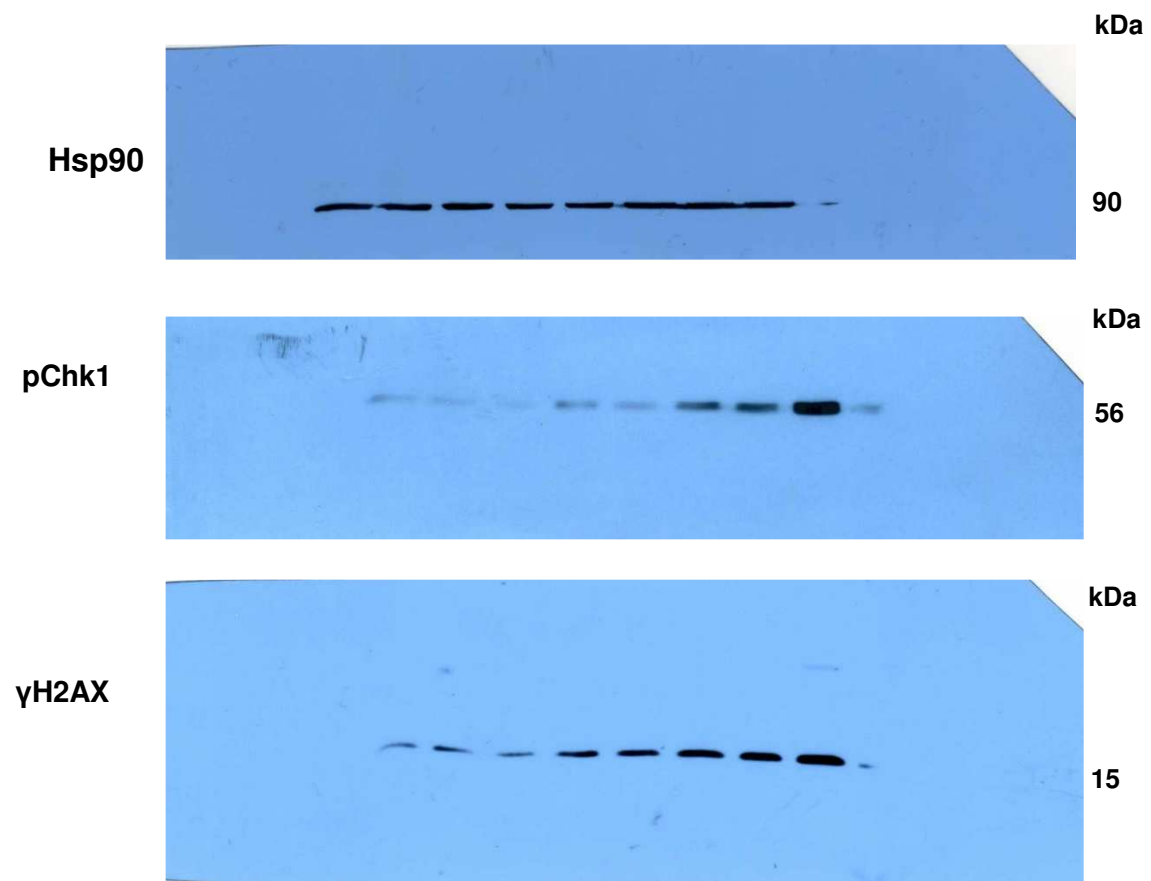

Fig. S5A

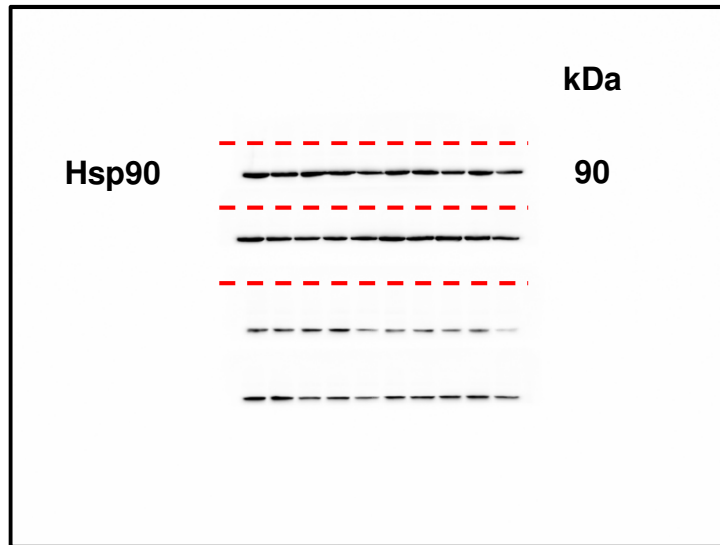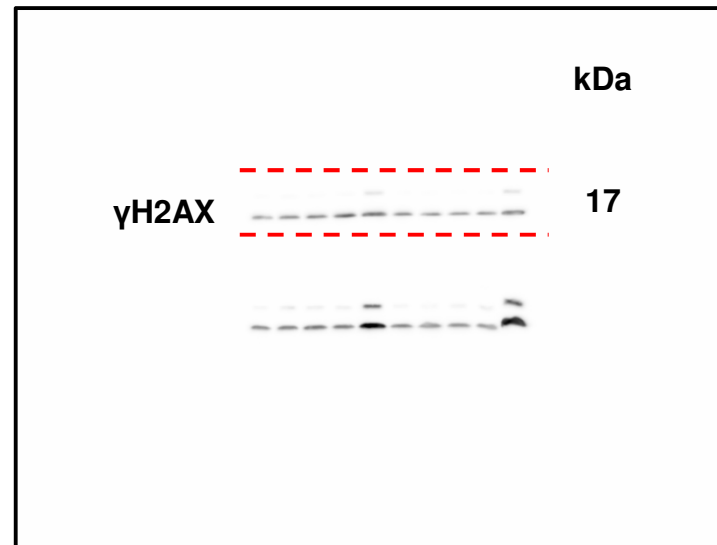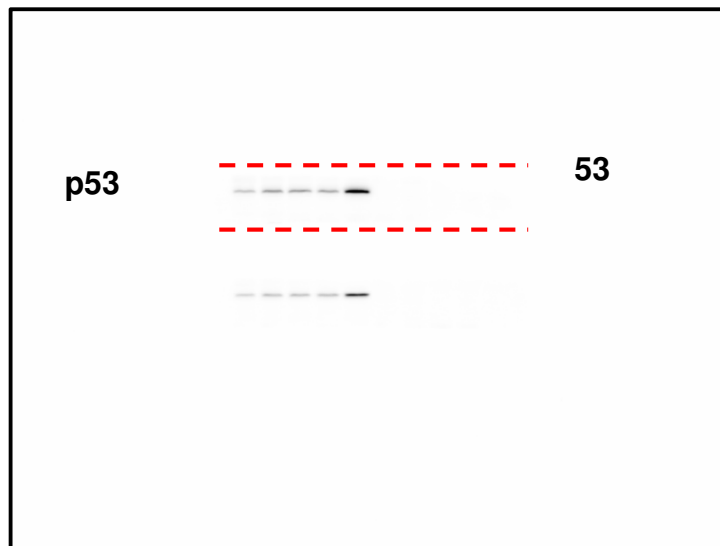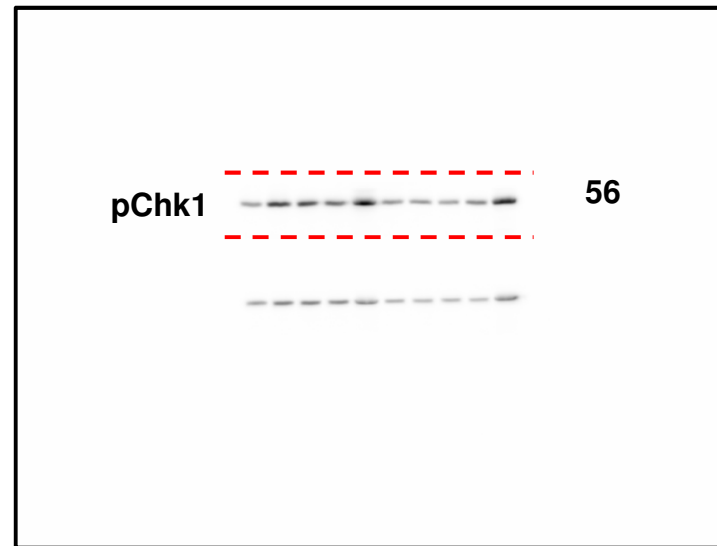

**Fig. S7D**

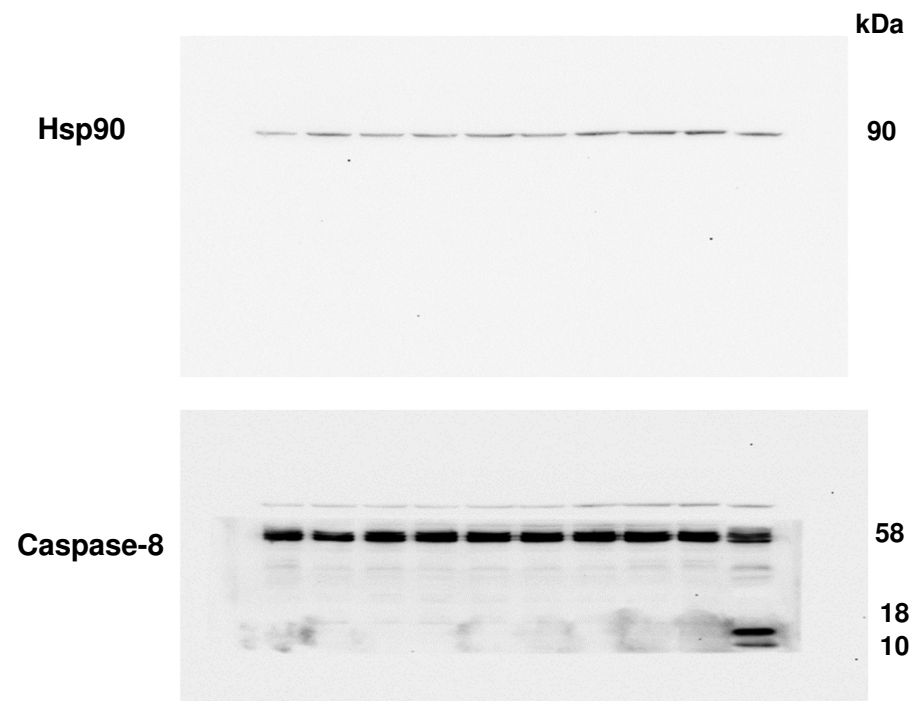

**Fig. S8A**

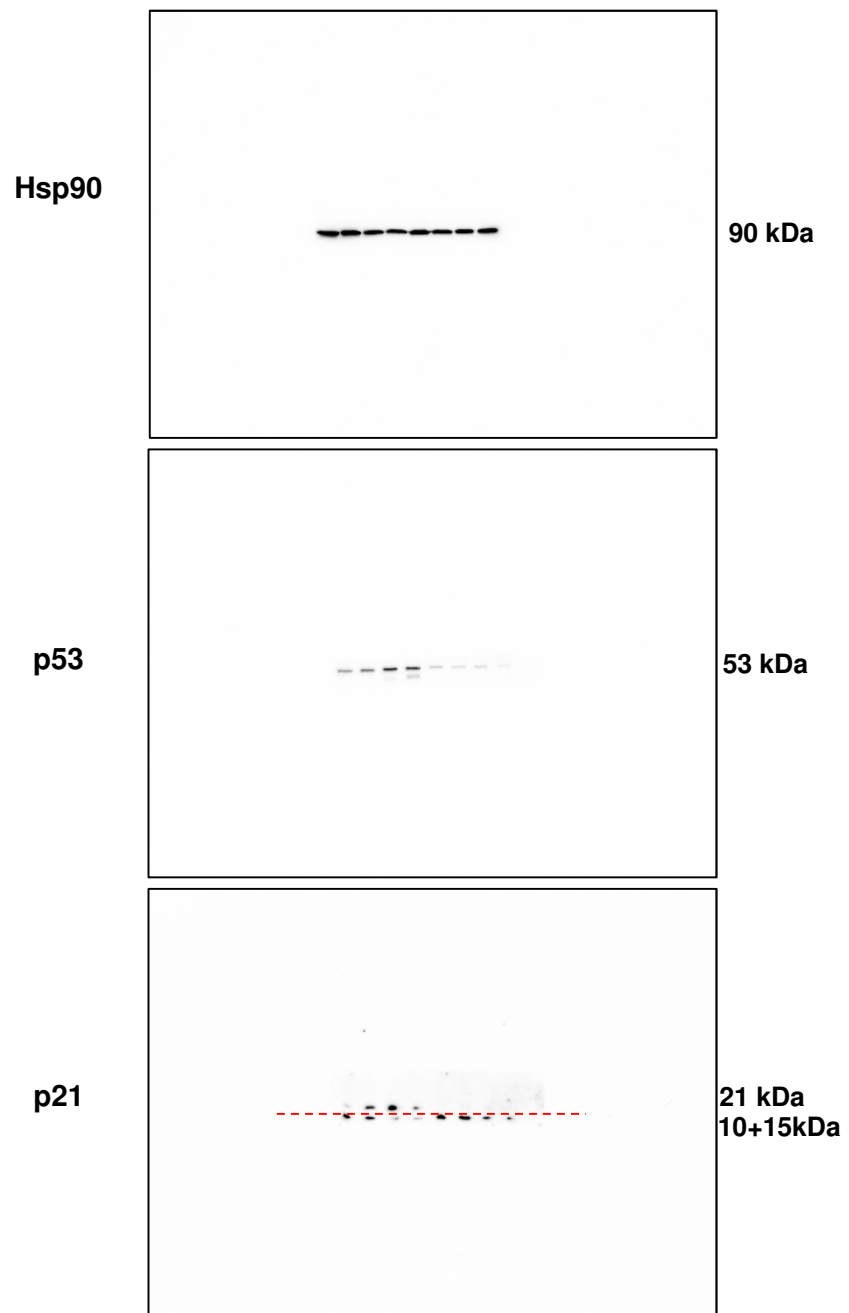

Supplement: 41419_2022_5446_MOESM12_ESM.pdf [file 41419_2022_5446_MOESM12_ESM.pdf]
