# Supplementary material for: p53 triggers mitochondrial apoptosis following DNA damage-dependent replication stress by the hepatotoxin methyleugenol
Source: PubMed Central journal article supplement (PMC9708695; doi:10.1038/s41419-022-05446-9), 2022-11-29
Supplement: 41419_2022_5446_MOESM2_ESM.pdf [file 41419_2022_5446_MOESM2_ESM.pdf]

## Supplementary Tables

**Table S1:** Compound specific mass spectrometric parameters<sup>a</sup> for dG, <sup>15</sup>N<sub>5</sub>-dG, N<sup>2</sup>-MIE-dG, N<sup>6</sup>-MIE-dA, [<sup>15</sup>N<sub>5</sub>]- N<sup>2</sup>-MIE-dG and [<sup>15</sup>N<sub>5</sub>]- N<sup>6</sup>-MIE-dA.

|                                                          | Q1      | Q3                 | DP | FP  | EP  | CEP | CE | CXP |
|----------------------------------------------------------|---------|--------------------|----|-----|-----|-----|----|-----|
| dG                                                       | 268.175 | 151.9 <sup>b</sup> | 6  | 350 | 4.5 | 12  | 15 | 18  |
|                                                          | 268.175 | 134.9              | 6  | 350 | 4.5 | 12  | 47 | 20  |
| <sup>15</sup> N <sub>5</sub> -dG                         | 273.083 | 157.3 <sup>b</sup> | 26 | 370 | 4   | 20  | 17 | 4   |
|                                                          | 273.083 | 138.9              | 26 | 370 | 4   | 20  | 49 | 4   |
| N <sup>2</sup> -MIE-dG                                   | 444.166 | 328.1 <sup>b</sup> | 46 |     | 10  |     | 17 | 34  |
|                                                          | 444.166 | 177.1              | 46 |     | 10  |     | 33 | 12  |
| N <sup>6</sup> -MIE-dA                                   | 428.170 | 177.0 <sup>b</sup> | 71 |     | 10  |     | 35 | 14  |
|                                                          | 428.170 | 312.1              | 71 |     | 10  |     | 21 | 22  |
| [ <sup>15</sup> N <sub>5</sub> ]- N <sup>2</sup> -MIE-dG | 449.078 | 333.1 <sup>b</sup> | 61 |     | 10  |     | 15 | 24  |
|                                                          | 449.078 | 177.1              | 61 |     | 10  |     | 41 | 12  |
| [ <sup>15</sup> N <sub>5</sub> ]- N <sup>6</sup> -MIE-dA | 433.094 | 177.1 <sup>b</sup> | 56 |     | 10  |     | 33 | 12  |
|                                                          | 433.094 | 317.1              | 56 |     | 10  |     | 21 | 18  |

<sup>a</sup> Q1, quadrupole 1 (*m/z*); Q3, quadrupole 3 (*m/z*); DP, declustering potential (V); FP, focusing potential; EP, entrance potential (V); CEP, collision cell entrance potential (V); CE, collision energy (V); CXP, cell exit potential (V).

<sup>b</sup> Transitions used as quantifier.

**Table S2: Primers used for qPCR**

| <b>qPCR target</b>   | <b>Forward Primer (5'-3')</b> | <b>Reverse primer (5'- 3')</b> |
|----------------------|-------------------------------|--------------------------------|
| <i>ACTB</i>          | TGGCATCCACGAAACTACC           | GTGTTGGCGTACAGGTCTT            |
| <i>ACTB hamster</i>  | CAAGGCCAACCGTGAAAA            | ACCAGAGGCATACAGGGACA           |
| <i>BAX</i>           | CAGAAGGCACTAATCAAG            | ATCAGATGTGGTCTATAATG           |
| <i>BCL2</i>          | TTCAGAGACAGCCAGGAGAAA         | AGTACCTGAACCGGCACCT            |
| <i>c-IAP1</i>        | TTCCCAGGTCCTCGTATCA           | CCGGCGGGGAAAAGTTGAATA          |
| <i>c-IAP2</i>        | TCACTCCCAGACTCTTTCCA          | CCCCGTGTTCTACAAGTGTC           |
| <i>FASR</i>          | AGAACTTGGAAGGCCTGCAT          | CTGGTTCATCCCCATTGACT           |
| <i>GAPDH</i>         | CATGAGAAGTATGACAACAG          | ATGAGTCCTTCCACGAT              |
| <i>HSP90 hamster</i> | GCAGTACGCCTGGGAGTC            | CCGTTTGGTCTTCTTTCAGG           |
| <i>MDM2</i>          | ATCTTGATGCTGGTGTA             | AGGCTATAATCTTCTGAGTC           |
| <i>NOXA</i>          | ACACGGTGGACGTCCTGT            | ACGAAGCACTTGGGGAAGAT           |
| <i>p21</i>           | TACATCTTCTGCCTTAGT            | TCTTAGGAACCTCTCATT             |
| <i>PUMA</i>          | GACGACCTCAACGCACAGTA          | CTGGGTAAGGGCAGGAGTC            |
| <i>SULT1A1</i>       | CAAAGGATGTGGCAGTTTCC          | CCGACCATGAACTTCTCCAG           |
| <i>Survivin</i>      | ATGACTTGTGTGTGATGA            | GTTTGTGCTATTCTGTGAA            |

**Table S3: Antibodies used for confocal immunofluorescence microscopy**

| <b>Antibody</b>                                                | <b>Catalog No.</b> | <b>Provider</b>                                        |
|----------------------------------------------------------------|--------------------|--------------------------------------------------------|
| Anti-cytochrome C, monoclonal mouse                            | #12963             | Cell Signaling Technology, Danvers, Massachusetts, USA |
| Anti-BAX (2D2), monoclonal mouse                               | #89477             | Cell Signaling Technology, Danvers, Massachusetts, USA |
| Anti-BrdU antibody, rat monoclonal                             | ab6326             | Abcam, Cambridge, UK                                   |
| Anti-BrdU antibody, mouse monoclonal                           | #347580            | Becton–Dickinson, UK                                   |
| Anti- $\gamma$ H2AX, monoclonal rabbit                         | ab11174            | Abcam, Cambridge, UK                                   |
| F(ab') <sub>2</sub> -Goat-anti-Mouse IgG (H-L) Alexa Fluor 488 | A-11017            | Life Technologies, Darmstadt, Germany                  |
| Goat anti-Rabbit IgG (H+L) Alexa Fluor 488                     | A-11008            | Life Technologies, Darmstadt, Germany                  |
| Donkey Cy3-coupled anti-rat                                    | 712-165-150        | Jackson ImmunoResearch Europe                          |
| Donkey Alexa488-coupled anti-mouse                             | 715-545-150        | Jackson ImmunoResearch Europe                          |

**Table S4: Antibodies used for SDS-PAGE and Western blot analysis**

| <b>Antibody</b>                              | <b>Catalog No.</b> | <b>Provider</b>                                        |
|----------------------------------------------|--------------------|--------------------------------------------------------|
| Anti-p53 (1C12), monoclonal mouse            | #2524              | Cell Signaling Technology, Danvers, Massachusetts, USA |
| Anti-p53 (DO1), monoclonal mouse             | sc-126             | Santa Cruz Biotechnology, Heidelberg, Germany          |
| Anti-p21 (C19), polyclonal rabbit            | sc-397             | Santa Cruz Biotechnology, Heidelberg, Germany          |
| Anti-p21 (F-5), monoclonal mouse             | sc-6246            | Santa Cruz Biotechnology, Heidelberg, Germany          |
| Anti-Hsp90 $\alpha/\beta$ , monoclonal mouse | sc-13119           | Santa Cruz Biotechnology, Heidelberg, Germany          |
| Anti-pChk1 serine 345, monoclonal rabbit     | #2348T             | Cell Signaling Technology, Danvers, Massachusetts, USA |
| Anti-pChk2 threonine 68, monoclonal rabbit   | #2197T             | Cell Signaling Technology, Danvers, Massachusetts, USA |
| Anti-cleaved Caspase 3, monoclonal rabbit    | #9661              | Cell Signaling Technology, Danvers, Massachusetts, USA |
| Anti-Caspase 8 p18, rabbit polyclonal        | Sc-7890            | Santa Cruz Biotechnology, Heidelberg, Germany          |
| Anti-cleaved Caspase 9, monoclonal rabbit    | #7237              | Cell Signaling Technology, Danvers, Massachusetts, USA |
| Anti-SULT1A1, polyclonal rabbit              | GTX55811           | Genetex, Irvine, California, USA                       |
| Anti- $\gamma$ H2AX, monoclonal rabbit       | ab11174            | Abcam, Cambridge, UK                                   |
| Goat-anti-Mouse HRP (IgGk binding protein)   | sc-516102          | Santa Cruz Biotechnology, Heidelberg, Germany          |
| Goat-anti-Rabbit-HRP                         | #7074S             | Cell Signaling Technology, Danvers, Massachusetts, USA |
