# Supplementary material for: p53 triggers mitochondrial apoptosis following DNA damage-dependent replication stress by the hepatotoxin methyleugenol
Source: PubMed Central journal article supplement (PMC9708695; doi:10.1038/s41419-022-05446-9), 2022-11-29
Supplement: 41419_2022_5446_MOESM13_ESM.pdf [file 41419_2022_5446_MOESM13_ESM.pdf]

Please complete the table below to indicate the contributions of all named authors to the figures.

Figure 1:

|  |
|--|
|  |
|--|

Figure 2:

|  |
|--|
|  |
|--|

Figure 3:

|  |
|--|
|  |
|--|

Figure 4:

|  |
|--|
|  |
|--|

Figure 5:

|  |
|--|
|  |
|--|

Figure 6:

|  |
|--|
|  |
|--|

Signed for and on behalf of the Author(s):



Print Name:

|  |
|--|
|  |
|--|

Date:

|  |
|--|
|  |
|--|
